# Supplementary material
Source: publisher site journal article supplement (https://www.dovepress.com/get_supplementary_file.php?f=275633.xlsx)
Supplement: Supplementary file 2 [file get_supplementary_file.php]

## Sheet: Sheet1
Supplementary file 1
NO.	Reference	Age(year)/Sex	History of tumor	Size(cm)	Location	Status at dignosed (PTNM)		Metastasis/Recurrence or not	Surgical treatment	Chemotherapy	Radiotherapy	postoperatic therapy	OS(M)	DFS(M)	Follow-up	Growth Pattern	Morphology	Mitosis/10HP	Osteoclast-like Giant Cells	S100	SOX10	MelanA	HMB-45	Other Positive Marks	KI-67(%)	FISH-ESWR1
1	Jennifer M. Boland, MD et al.	46/F		3.5	Gastric wall	T2B	NF	NO	paticial gastrectomy	NA		NA	NA	NA	NA	Sheet-like	Spindle	High	NO	+	+	_	NA		NA	+
2	BENJAMIN M, et al.	5/F		3	Left parapharynge	T2	M1N1	Y	Y	NA		NA	16	NA	AWD	Vaguely fascicular arrangements	Spindle	8	Yes	+	+	NA	cytoplasmic staining of isolated mononuclear cells only	MITF,INI1	NA	+
3	A Gahanbani Ardakani,et al.	22/M		7	Ascending colon	T2b	N1M0	NO	laparoscopic right hemicolectomy	NO		NO	0.69	0.69	NED	Perivascular growth;Pseudopapillary formation	Epithelioid	20	NO	+	NA	NA	0		NA	+
4	CELIA GREEN1, et al.	33/M		2.7	Ileum	T2b	N1M0	Y	surgical debulking procedure	NA		NA	10	1	DOD	Nests, Fascicular, Pseudopapillary and Pseudoalveolar	Epithelioid	frequent	Yes	+	+	0	0	synaptophysin (partial +)，CD56,CD57	NA	+
5	Mohammed J. Alyousef,et al.	18/M		11	Jejunum	T2a	N0M0	Y	exploratory laparotomy and excision of the jejunal mass.	NO	NO	NO	48	36	DOD			frequent	Yes	+	NA	_	_	vimentin	NA	+
6	Luigi Insabato a,et al.	29/M	Ewing sarcoma diagnoed in 5 years old with 5 cycles of chemotherapy	NA	Gastric antrum	NA	NA	Y	partial gastrectomy	etoposide–ifosfamide after liver-metastasis	NO	NO	74	36	AWD	Nests and Cords		low	NA	+	NA	NA	_	vimentin, FLI-1（ewing sarcoam history）,NSE(partial +)	NA	+
7	Sung Bum Kim,et al.	21/M		3.5	Esophages	NA	NA	NO	excision	NO	Y	Y	5	5	NED	Fascicles		11	NA	+	+	0	0	vimentin	NA	+
8	Keiko Segawa,et al.	41/F		4	Ileum	NA	NA	NA	NA	NA	NA	NA	28	NA	NED			NA	NA	+	NA	_	NA	NA	NA	NA
9		78/F		9	Ileum	NA	NA	NA	NA	NA	NA	NA	48	NA	NED			NA	NA	+	+	_	NA	NA	NA	NA
10		38/F		10	Small intestine	NA	NA	NA	NA	NA	NA	NA	17	NA	DOD			NA	NA	+	NA	_	NA	NA	NA	NA
11		20/F		4	Ileum	NA	NA	NA	NA	NA	NA	NA	7	NA	NED			NA	NA	+	+	_	NA	NA	NA	+
12		47/F		4.5	Ileum	NA	NA	NA	NA	NA	NA	NA	34	NA	AWD			NA	NA	+	+	_	NA	NA	NA	+
13		57/M		3	Esophagus	NA	NA	NA	NA	NA	NA	NA	18	NA	NED			NA	NA	+	+	_	NA	NA	NA	NA
14	David L. Stockman, et al.	30/F		Ranged in size from 2.4 to 15 cm in greatest dimension (mean= 5.2 cm; median= 3.8 cm)	Jejunum	NA	NF	Y	NA	NA	NA	NA	21	NA	AWD	Solid sheets, Nests	Epithelioid	NA	NO	3+	3+	NA	NA	NA	NA	+
15		35/M			Jejunum	NA	NF	Y	NA	NA	NA	NA	18	NA	DOD	Solid sheets, nests	Epithelioid, Oval	NA	Yes	3+	3+	NA	NA	NA	NA	+
16		33/M			Ileum	NA	NF	Y	NA	NA	NA	NA	1.5	NA	AWD	Pseudopapillary,Pseudoalveolar	Epithelioid	NA	Yes	3+	3+	NA	NA	NA	NA	+
17		50/F			Stomach	NA	NF	NO	NA	NA	NA	NA	24	NA	AWD	Solid sheets, Nests	Epithelioid	NA	NO	+	3+	NA	NA	NA	NA	+
18		20/F			Small intestine	NA	NF	NA	NA	NA	NA	NA	20	NA	NED	Fascicular, Nests	Spindle	NA	NO	3+	3+	NA	NA	NA	NA	+
19		52/M			Ileum	NA	NF	NA	NA	NA	NA	NA	22	NA	DOD	Solid sheets, Nests	Epithelioid	NA	Yes	3+	3+	NA	NA	NA	NA	_
20		46/M			Stomach	NA	NF	NA	NA	NA	NA	NA	NA	NA	NA	Solid sheets	Epithelioid, Oval	NA	Yes	3+	NA	NA	NA	NA	NA	+
21		34/F			Stomach	NA	NF	NA	NA	NA	NA	NA	19	NA	DOD	Solid sheets, Pseudoalveolar	Epithelioid, Spindle	NA	Yes	+	3+	NA	NA	NA	NA	+
22		37/F			Ileum	NA	NF	NA	NA	NA	NA	NA	NA	NA	NA	Solid sheets, Nests	Epithelioid, Oval	NA	Yes	3+	NA	NA	NA	NA	NA	NA
23		77/F			Colon	NA	NF	NA	NA	NA	NA	NA	106	NA	DOD	Solid sheets	Epithelioid	NA	Yes	3+	3+	NA	NA	NA	NA	+
24		31/M			Colon	NA	NF	Y	NA	NA	NA	NA	3	NA	DOD	Solid, Microcystic	Epithelioid, Oval	NA	NO	3+	NA	NA	NA	NA	NA	_
25		17/M			Small intestine	NA	NF	NO	NA	NA	NA	NA	NA	NA	NA	Nests, Infiltrative	Epithelioid, Oval	NA	Yes	+	3+	NA	NA	NA	NA	+
26		60/M			Ileum	NA	NF	Y	NA	NA	NA	NA	36	NA	AWD	Solid sheets, Nests	Epithelioid, Oval	NA	NO	3+	3+	NA	NA	NA	NA	+
27		60/F			Stomach	NA	NF	NO	NA	NA	NA	NA	41	NA	NED	Solid sheets, Nests	Epithelioid, Spindle	NA	NO	3+	3+	NA	NA	NA	NA	+
28		56/M			Small intestine	NA	NF	NA	NA	NA	NA	NA	NA	NA	NA	Solid sheets, Nests	Epithelioid, Oval	NA	NO	3+	3+	NA	NA	NA	NA	+
29		28/F				NA	NF	NA	NA	NA	NA	NA	23	NA	DOD	Solid sheets	Epithelioid	NA	NO	3+	3+	NA	NA	NA	NA	+
30	Breton S ,et al.(France)			NA	Tongue	NA	NF	NA	NA	NA	NA	NA	NA	NA	NA			NA	NA	NA	NA	NA	NA	NA	NA	+
31	Vivek Subbiah,et al.	27/F		NA	Small intestine	T2a	N1M1	Y	Y	crizotinib and pazopanib for 2.8 yrs after metastasis	palliative radiotherapy after metastasis	NO	65	18	AWD			NA	NA	NA	NA	NA	NA	NA	NA	+
32	Yi-Shan Lee,et al.	28/F		1.2	oesophagus	T1	N0M0	Y	Y	treated with IL-2 as melanoma after metastasis	Y	Y(radiation)	120	NA	AWD	Alveolar packets,Large nests	Epithelioid	NA	Yes	+	NA	_	_	synaptophysin(weak +)	NA	+
33	Gülçin Yegen,et al.	25/F		3.2	Jejunum	T1	N0M1	Y	Y	Y	NO	Y	47	NA	AWD	Pseudopapillary,Alveolar, Solid	Epithelioid	NA	Yes	+	NA	_	_	vimentin, CD56, bcl-1 and β-catenin	0.35	+
34	Christopher W. Toon,et al.	53/M		3	Small intestine	T1	N0M1	Y	Y	NO	NO	NO	6	6	AWD	Pseudopapillary,Alveolar	Epithelioid, Oval	10	NO	+	+	_	_	CD56,Synaptophysin(partial +)		+
35	Keduovinuo K. Kedits,et al.	37/F		NA	Ileum	T2	N1M1	Y	Y	EFT after metastasis	NO	NO	30	12	AND			NA	NA	NA	NA	NA	NA	NA	NA	+
36	Kota Washimis,et al.	32/F		6.5	Transverse colon	NA	N1M0	Y	Y	ifosfamide and doxorubicin	NO	Y	38	38	AWD	Solid sheets	Round to oval cells	15	Yes	+	NA	_	_	vimentin, BCL2, and synaptophysin,chromogranin A, CD56,EMA	0.3	+
37	MICHELA LIBERTINI,et al.	59/F	RCCin55Y	NA	Stomach	NA	N1M0	Y	Y	Y three cycles of single agent chemotherapy (dacarbazine 800 mg/m2), with progression	NO	Y	18	11	DOD			NA	NA	NA	NA	NA	NA	NA	NA	NA
38		28/F	neurofibromatosis type 1 (NF1) history	NA	Small intestine	NA	N0M0	Y	Y	NO	NO	NO	161	109	NED			NA	NA	NA	NA	NA	NA	NA	NA	NA
39		27/F		NA	Small intestine	NA	M1	Y	Y	NO	NO	NO	4	2	DOD			NA	NA	NA	NA	NA	NA		NA	NA
40		33/M	hepatoblastoma, with (cisplatin and doxorubicin) chemotherapy followed by partial hepatectomy and radiotherapy in 13 yrs	3	Small intestine	NA	N1MO	Y	Y	NO	NO	NO	8	2	DOD	Nest	Epithelioid, Spindle	》20	NO	+	NA	NA	_	(partial +)：EMA,CD56;NSE;INI	NA	NA
41		48/M		NA	Small intestine	NA	N0M0	Y					NA	NA	DOD			NA	NA	NA	NA	NA	NA	NA	NA	NA
42		27/M		NA	Small intestine	NA	NOM1	Y					2	NA	NED			NA	NA	NA	NA	NA	NA	NA	NA	NA
43	Jayson Wang,et al.	Review				NA	NA	NA	NA	NA	NA	NA	NA	NA	NA	NA	NA	NA	NA	NA	NA	NA	NA	NA	NA	NA
44	Nicolaus Friedrichs,et al.	41/M		8.7	Small intestine	NA	NA	Y	Y	CWS-96 protocol (ifosfamid, vincristin, actinomycin D) were performed after liver metastaed	NO	NO	6	NA	AWD	Solid sheets, Pseudoalveolar	Epithelioid	NA	Yes	+	NA	NA	_	vimentin,BCL2(weak +)	0.2	+
45	Thibault Kervarrec,et al.(France)	41			Small intestine	NA	NA	Y	NA	NA	NA	NA	NA	NA	NA	NA	NA	NA	NA	NA	NA	NA	NA		NA	NA
46	GAO-XIANG HUANG,et al.	30/F	chronic granulomatous inﬂammation nodules on the omentum and ileal serosa	3.5	Ileum	T2A	N0M0	NO	Y	ifosfamide + epirubicin	NO	Y	6	6	NED			8	Yes	+	1	_	_	vimentin,CD56	NA	+
47	Dimas Sua´ rez-Vilela,et al.	36/F		8	Jejunum	T2A	N0M0	NO	Y	NO	NO	NO	48(not exactly)	NA	NED4Y	Solid sheets	Round cells	8	Yes	+		_	_	vimentin,bcl2,cd57; partial + :AE1/AE3cytokeratin,EMA,CD56	0.2	+
48	Takashi Kato, et al.	47/F		4.5	Small intestine	T4a	N0M0	Y	Y	NA	NA	NA	1	1	AWD	Solid nests、 Pseudopapillary formation	Epithelioid, Spindle	NA	Yes	+	1	_	_	vimentin		+
49	Seung Hwan Song,et al.	23/M	A recurrence case	4	Esophagus	T1	N0M0	NA	Y,Ivor-Lewis operation	NO	Y	Y	48	12	NED			30	NO	+	1	_	_			NA
50	Surbhi Kansal,et al.	55/F		4.5	Jejunum	T1	NA	NA	Y	NA	NA	NA	NA	NA	NA	Solid sheets, Pseudoalveolar	Spindle	7	NO	+	NA	_	_	vimentin/synaptophysin/neurofilament	8-9%	NA
51	Zhihua Zhao,et al.	33/F		5.5	Ileum	NA	N0M0	NO	Y	Y, ifosfamide and epirubicin,4cycles	NO	Y	12	12	NED	Solid nests、 Pseudopapillary formation	Epithelioid or polygonal appearance	1	NO	+	NA	_	_	vimentin/synaptophysin/ CD56/CD99	NA	+
52	Cristina R,et al.	81/F	moderately differentiated adenocarcinoma of the transverse colon; CCS of the gastrointestinal tract in the ascending colon.	Median 5.7	Ascending colon	NA	N1	Y	Y	Y ， 5-fluorouracil/leucovorin，7M	NO	Y	60	NA	AWD	Solid sheets, Pseudoalveolar	Epithelioid, Oval ,Spindle	8	NA	+	NA	_	_	CD56,NSE,synaptophysin,vimentin(partial +)	NA	+
53		42/F		NA	Ileum	NA	N0M0	NO	Y	NA	NA	NA	NA	NA	NA			8	Yes	NA	NA	NA	NA	NA	NA	+
54		42/F		3.7	Ileum	NA	N1M1	Y	Y	NA	NA	NA	NA	NA	NA			8		NA	NA	NA	NA	NA	NA	+
55	Grigory A. Raskin,et al.	21		5	Small intestine	NA	NA	Y	Y	NA	NA	NA	NA	NA	NA			NA	NA	+	NA	_	_	FLI-1,CD99,vimentin		+
56	Gokce Askan,et al.	28/M		4.2	Small intestine	T2A	N1M1	Y	Y	Y,8M	NO	Y	8	NA	AWD	Nest	Epithelioid, Spindle	12	Yes	+	NA	_	_	RB	0.5	+
57	Camilla E,et al.	31/F		2.8	Ileum	T1	N1M0	Y	Y	NA	NA	NA	NA	NA		Nested to fascicular	Epithelioid, Spindle	2	NO	+	NA	_	_	vimentin	NA	+
58	Francesco E. D’Amico,et al.	69/F		5.9	Jejunum	T2B	N0M0	Y	Y	Y,Epirubicinafter liver metastatic	NO	NO	10	6	AWD		Medium-size round cells	5	Yes	+	NA	_	_	CD56,INI1,CK/斑片阳性AE1/3	NA	+
59	Mee Joo,et al.	60/M		2.4	Ileum	NA	N1M1	Y	Y	NA	NA	NA	NA	NA	NA	Solid nests、 Pseudopapillary formation	Epithelioid	2	Yes	+	NA	_	_	vimentin,CD56,synaptophysin	NA	+
60		46/M	postoperation IgG494mg/dl	6	Jejunum	T4a	N1M1	Y	Y	NA	NA	NA	NA	NA	NA	Sheets or Nests		5	NO	+	NA	_	_	vimentin;	NA	+
61	Przemysław Wolak,et al.	12/F		4	Small intestine	T1	N1M0	Y	Y	Y	NO	Y	18	2	DOD	Nests and sheets , Alveolar, Pseudopapillary	Epithelioid	NA	Yes	+	NA	_	_	vimentin,CD99NSE,PSA,LCA,WT-1	NA	+
62	Eduardo Zambrano,et al.	17/F	acute lymphoblastic leukemia, pre-B cell type,with chemotherapy history	5	Jejunum	T2a	N1M0	Y	Y	Y	NO	Y	16	12	DOD			NA	NA	+	NA	_	_	vimentin,CD57,NSE	NA	+
63		21/F		4	Jejunum	T2A	N1M1	Y	Y	Y	NO	Y	12	NA	DOD	Solid nests、 Pseudopapillary formation	Oval,Round,Spindle	NA	Yes	+	NA	_	_	vimentin	NA	NA
64		35/F		3.5	Ileum	T2A	N1M0	Y	Y	NA	NA	NA	12	12	AWM			NA	Yes	+	NA	_	_	vimentin	NA	NA
65		37/F		4.5	Ileum	T2A	NA	NA	Y	NA	NA	NA						NA	Yes	+	NA	_	_	vimentin	NA	NA
66		13/M	rhabdomyosarcoma or misdiagnosed	6.7	Stomach	T3	NA	Y	Y	Y	NO	Y	36	NA	AWD			NA	Yes	+	NA	_	_	vimentin	NA	NA
67		32/M		5	Ileum	T2B	N1M0	Y	Y	NA	NA	NA	NA	NA	NA			NA	Yes	+	NA	_	_	vimentin	NA	NA
68	Ming Z ,et al.(china)	57/M		5.5	The jejunal ileum junction	T2A	N0M0	NA	Y	NO	NO	NO	16	16	NED	Solid nests、 Pseudopapillary formation	Oval	15	Yes	+	1	_	_	CD56	0.4	+
69		24/M	Recurrence case	6	Small intestine	NA	NF	Y	Y	Y	NA	NA	32	6	AWD	Nests , Fascicular, Pseudopapillary	Oval,Round,Spindle	11	Yes	+	1	_	_	CD56, Ckpan(focal +)	0.3	+
70	Qian L,et al.(china)	36		7	Stomach	T2B	N1M0	NO	Y	NA	NA	NA	NA	NA	NA	Solid sheets	Oval,Round	NA	Yes	+	NA	_	_	vimentin,CD57 BCL-2		+
71	Yanfen W,et al.(china)	32/F		6	Small intestine	T4A	N0M0	NO	Y	NO	NO	NO	6	6	AND	Solid nests、 Pseudopapillary formation	Epithelioid,Oval,Round,Spindle	4	NA	+	1	_	_	Focal +:CD56,Syn , NSE	0.3	+
72	Tongmei H,et al.(china)	36/F		3.5	Ascending colon	T2B	N1M0	NO	Y	NA	NA	NA	10	NA	DOD	Solid nests、 Pseudopapillary formation	Epithelioid, Spindle	6	Yes	+	1	_	_	CD56,FLI-1,vimentin,SYN	0.2	+
73	kraft,et al.	82/F		2	Left tongue	T4a	N1M1	Y	Y	NO	Y	NO	7	7	NED	Solid nests、 Pseudopapillary formation	Epithelioid, Spindle	3	NO	+	NA	_	_	INI-1		+
74	Meng-Na Zhan,et al.(china)	30/F	poorly differentiated adenocarcinoma of the stomach with chemotherapy.	3	Ileum	T1	NOMO	Y	Y	Y	NO	Y	36	14	AWD	Solid nests、 Pseudopapillary formation	Epithelioid, Spindle	NA	NA	+		_	_			+
75	Bin Chang,et al.	29/F		NA	Small intestine	NA		Y	Y	NA	NA	NA	NA	NA	NA	Nests and sheets , Alveolar, Pseudopapillary	Epithelioid	9	NO	+	NA	_	_		0.05	NA
76		44/M		NA	Small intestine	T2b	N0M0	NA	Y	NO	NO	NO	61	NA	DOD	Diffuse	Spindle	12	NO	+	NA	_	_		0.3	NA
77		41/M		3	Sigmoid colon	T2b	N0M0	Y	Y	NO	Radiofrequency ablation of liver metastatic tumor	NO	63	8	NED	Glandual,papillary	Epithelioid	11	NO	+	NA	_	_		0.3	+
78		42/M		3.5	Right colon	T1	N0M0	NO	Y	dacarbazine+cisplatinumn, 6 cycles		Y	46	46	NED	Sheet,nests,fascicular	Epithelioid, Spindle	4	NO	+	NA	NA	_		0.15	+
79		51/F		5	Small intestine	T2b	N1M0	Y	Y	NA	NA	NA	36	11	DOD	Nest,Papillary	Epithelioid	2	NO	+	+	_	_		0.25	+
80		30/F		3	Small intestine	T2a	N0M0	Y	Y	Sunitinib (12 wk)/serious side effects	NA	Y	43	14	AWD	Solid sheet,Nests and sheets , Alveolar, Pseudopapillary	Epithelioid	16	NO	+	#REF!	NA	_		0.35	+
81		48/F		3	Anus	NA	N0M0	NA	Y	NA	NA	NA			NA	Fascicular,Nests	Epithelioid, Spindle	22	NO	+	+	_	_		0.6	+
82		42/F		6	Small intestine	T2b	N0M0	NO	Y	NO	NO	NO	3	3	NED	Fascicular,Nests	Epithelioid, Spindle	8	NO	+	+	_	_		0.2	+
83		41/F		5.5	Small intestine	T2a	N0M0	Y	Y	NA	NA	NA		4	AWD	Pseudoglandular,papillary	Epithelioid	6	NO	+	+	_	_		0.2	+
84		56/F		3	Ileum	T2b	N0M1	Y	Y	NO	NO	NO	33	0	NED	Pseudoglandular,Microcytic	Epithelioid	11	NO	+	+	_	_		0.1	+
85		30/F		4	Ileum	T2b	N0M0	NA	Y	NA	NA	NA	NA	NA	NA	Solid sheets,Papillary	Epithelioid	1	NO	+	+	_	_		0.05	+
86		59/M		4	Small intestine	T2a	N0M0	NO	Y	NO	NO	NO	29	29	NED	Solid sheets,Papillary	Epithelioid, Spindle	9	Scatted	+	+	_	_		0.3	+
87		27/F		NA	Ileocecal junction	T1	N0M0	Y	Y	Apatinib (4 mo)	NO	NA	26	13	AWD	Solid sheets,Papillary	Epithelioid, Spindle	14	NO	+	+	_	_		0.3	NA
88		47/M		5	Small intestine	T2b	N1M0	Y	Y	Pazotinib+pembrolizumab	NO	NA	48	27	AWD	Nests, Pseudoglandular	Epithelioid	3	NO	+	+	_	_		0.25	+
89		36/M		5	Small intestine	T2a	N0M0	NO	Y	Vincristine amide+adriamyci	NO	Y	3	3	NED	Nests, Pseudoglandular	Epithelioid	17	NO	+	+	_	_		0.1	+
90		40/F		3	Gastric body	T2a	N1M0	NO	Y	Adriamycin+dacarbazine	NO	Y	8	8	NED	Nests	Epithelioid	3	NO	+	+	_	_		0.2	+
91		41/F		7	Gstric antrum	T2b	N0M0	Y	Y	Oxaliplatin	NO	NA	29	17	AWD	Sheets,Cords	Epithelioid, Spindle	1	NO	+	+	_	_		0.1	NA
92		64/M		6	Gatric body	T1	N0M0	NO	Y	Adriamycin+ifosfomaide	NO	Y	14	14	NED	Solid sheets,Papillary	Epithelioid	4	NO	+	_	_	_		0.6	+
93		55/M		5	Esophage	T2b	N1M0	NA	Y	NA	NA	NA	NA	NA	NA	Solid sheet,Nests	Epithelioid, Spindle	30	NO	+	+	_	_		0.6	_
94	Yuan Li,et al.	40/M		1.5	Bronchia	/	/	Y	Y	Emcitabin+ Pnedaplatin	Y	Y	24	12	AWD	Solid sheet,Nests	Epithelioid, Spindle	Frequent	Yes	+	+	_	_		/	+
95	our date	17/M		6	Gastric antrum	T2b	N0M0	NA	Y	Y	NO	Y	10	10	NED	Nests , Fascicular, Pseudopapillary, Pseudoalveolar and rosette-like growth patterns	Spindle	NA	Yes	+	+	_	_	BCL-2，CD57(partial +)	5%-10%	+
96		62/F		5	Ileocecal junction	T2B	N1M1	Y	Y	NA	NA	NA	6	NA	NED	Solid nests、 Pseudopapillary formation	Epithelioid, Spindle	NA	NA	3+	2	_	_	vimentin	0.15	+
M:Male; F: Female; Y: Yes ; NA:Not Availiable; OS: Overall Survival time; DFS:Diease-Free Survival time
